# Supplementary material
Source: PubMed Central journal article supplement (PMC7334974)
Supplement: NIHMS1603528-supplement-1603528_Sup_Info.pdf [file NIHMS1603528-supplement-1603528_Sup_Info.pdf]

# Supporting Information

## Biometals as Conformational Modulators of $\alpha$ -Synuclein

### Photochemical Crosslinking

Dinendra L. Abeyawardhane, Alyson M. Curry, Ashley K. Forney, Joel W. Roberts, and Heather R. Lucas\*

Department of Chemistry, Virginia Commonwealth University, Richmond VA 23284

\*corresponding author

✉ hrlucas@vcu.edu

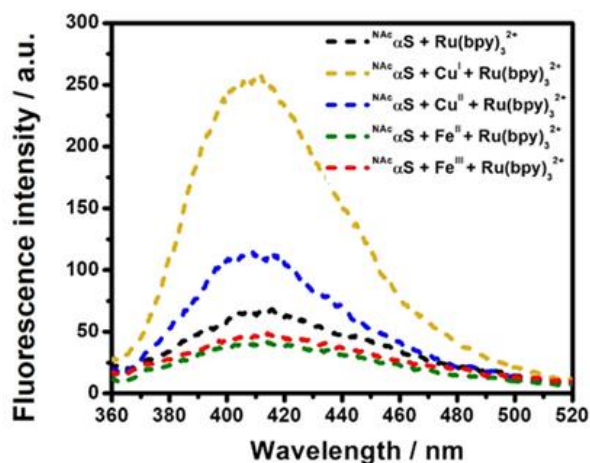

**Fig S1.** Photo-initiated dityrosine fluorescence emission of metal-bound  $\text{N}^{\text{Ac}}\alpha\text{S}$  in the absence of APS.
